# Supplementary material for: The Antiviral Activity of the Lectin Griffithsin against SARS-CoV-2 Is Enhanced by the Presence of Structural Proteins
Source: Viruses. 2023 Dec 18;15(12):2452. doi: 10.3390/v15122452 (PMC10747160; doi:10.3390/v15122452)
Supplement: Supplementary file 1 [file viruses-15-02452-s001.zip › Raw Data Reviewer.xlsx]

## Sheet: ELISA
ELISA Titers
	Wild-Type	M	N	E	MNE
Wild-Type 8/8/2022 12-well dish. Bad batch, V15 pg 74	1.70434e-13
	1.64773e-13
	1.64967e-13
Wild-Type 09/16/2022 "Craw Wild Type" V12 p130. 3/2/22. ELISA V15 p46	1.7454e-11
	3.5444e-11
	6.0497e-11
	6.39455e-11
Wild-Type 09/16/2022 "Craw Wild Type" V12 p130. 3/2/22. ELISA V16 p173	2.597e-11
	2.619e-11
	2.79968e-11
Wild-Type Virus "Final Batch" V15 p117. Yellow box 2021; ELISA V16 p173	1.92846e-12
	1.87221e-12
	1.85002e-12
M Virus V15 p105 (ELISA V16 p181)		8.83099e-13
		5.29216e-13
		5.83316e-13
M Virus V15 p105 (ran infect V15 p121, ELISA V16 p188)		6.74342e-13
		6.34894e-13
		7.97315e-13
N Virus V15 p125 6 well plate 9/2/2022 (ELISA V16 p181)			1.88703e-12
			1.32053e-12
			1.44643e-12
E Virus V15 p125 6 well plate 9/2/2022 (ELISA V16 p181)				8.44928e-13
				5.222e-13
				5.42614e-13
E Virus V15 p125 6 well plate 9/2/2022 (ELISA V16 p188)				6.48457e-13
				5.00417e-13
				6.87091e-13
MNE V15 p198 in "Finale Box" Low Infectivity (ELISA V16 p188)					6.78572e-13
					5.26554e-13
					5.9719e-13
MNE V15 p216 In "Finale box" New Batch. Very Hi Infectivity (ELISA V15 p188)					3.59584e-11
					4.26082e-11
					3.70653e-11

## Sheet: Trans Infection Raw
09032022 V15 pg124
																																												8/8/2022 Virus WT	12 well dish bad V15 p74
																																											batch 8/8/2022 Publication Stocks Box, as 08/05/2022 12 well plate			Avg molarity of overall particles	SD of overall particles
																																													WT virus elisa titer on V16 pg 173 11/09/2022	1.66725e-13	2.62421e-15
																																											WT 3t3 DC-SIGN Trans	WT 3t3 DC SIGN Mannan	WT 3t3 WT Neg Ctrl	WT virus 293t hACE2 Pos Ctrl	WT virus 293Ft WT Virus Neg Ctrl	WT Virus-only ctrl
																																											392	7815	25	12486	7175	19
																																											667	319	17	33123
																																											571	1294	19	25148
																																										Avg	543.333	3142.67	20.3333	23585.7	7175	19
																																										SD	113.96	3327.73	3.39935	8497.14	0	0
																																										Signal per mole of virion	3t3 DC-SIGN	3t3 DC SIGN Mannan	3t3 WT Neg Ctrl	293t Pos Ctrl	Neg Ctrl Virus	293Ft direct infect neg ctrl
																																											2.35118e+15	4.68737e+16	1.49948e+14	7.48899e+16	4.3035e+16	1.1396e+14
																																											4000607624880771	1.91333e+15	1.01965e+14	1.98669e+17
																																											3424808026697032	7761298750518318	1.1396e+14	1.50836e+17
																																										Avg	3.25887e+15	1.88494e+16	1.21958e+14	1.41465e+17	4.3035e+16	1.1396e+14
																																										SD	6.83522e+14	1.99594e+16	2.0389e+13	5.09651e+16	0	0
09162022 V15 pg153
																																											9/16/2022 Virus WT		3/2 Craw 10 cm dish V12 p130 good
																																										Batch "Craw WT" V12 pg 130		Avg molarity of overall particles	SD od overall particles		overall avg of overall molarity
																																											WT virus elisa titer V15 pg 46 07/18/2022	4.43352e-11	1.90225e-11		3.55263e-11
																																											WT virus elisa titer V16 pg 173 11/09/2022	2.67174e-11	9.09103e-13
																																											WT 3t3 DC-SIGN Trans	WT 3t3 DC SIGN Mannan	WT 3t3 WT Neg Ctrl	WT virus 293t hACE2 Pos Ctrl	WT virus 293Ft WT Virus Neg Ctrl	WT Virus-only ctrl
																																											17407	34	1167	85425	21678	134
																																											19078	203	230	77461	5321	150
																																											25232	30	42	153571
																																										Avg	20572.3	89	479.667	105486	13499.5	142
																																										SD	3364.76	80.6267	492.041	34156.6	8178.5	8
																																										Signal per mole of virion	3t3 DC-SIGN	3t3 DC SIGN Mannan	3t3 WT Neg Ctrl	293t Pos Ctrl	Neg Ctrl Virus	293Ft direct infect neg ctrl
																																											4.89975e+14	9.57037e+11	3.28489e+13	2404554841548877	610195374364607	3.77185e+12
																																											5.3701e+14	5.71407e+12	6.47407e+12	2.18038e+15	1.49776e+14	4.22222e+12
																																											710233863177773	8.44444e+11	1.18222e+12	4322737975668745
																																										Avg	579072914470284	2.50518e+12	1.35017e+13	2.96923e+15	3.79986e+14	3.99704e+12
																																										SD	9.47118e+13	2.26949e+12	1.385e+13	9.61444e+14	2.3021e+14	2.25185e+11
10302022 V15 pg202
																																											WT
																																										Batch "Final" V15 pg 117 Yellow tape box 2021
																																												Avg molarity of overall particles	SD of overall particles
																																											WT virus elisa titer on V16 pg 173 11/09/2022	1.88357e-12	3.30133e-14
																																											Trans Infect 3t3 DC SIGN	Trans Infect 3t3 DC-SIGN Mannan	Trans Infect 3t3 WT	WT 293t hACE2 Pos Ctrl	293Ft WT Direct Infect Neg Ctrl	Virus Only Neg Ctrl
																																											197856	18951	46227	288481	1535	168
																																											215130	36812	21496	445832	14362	254
																																											155804	32044	18146	487843
																																										Avg	189597	29269	28623	407385	7948.5	211
																																										SD	24913.9	7551.13	12522.8	85809.5	6413.5	43
																																										Signal per mole of virion	3t3 DC-SIGN	3t3 DC SIGN Mannan	3t3 WT Neg Ctrl	293t Pos Ctrl	Neg Ctrl Virus	293Ft direct infect neg ctrl
																																											1.05043e+17	1.00612e+16	2.45423e+16	1.53157e+17	8.14943e+14	8.91925e+13
																																											1.14214e+17	1.95438e+16	1.14124e+16	2.36696e+17	7624897303854713	134850572008014
																																											8.27176e+16	1.70124e+16	9633852282115836	2.59e+17
																																										Avg	1.00658e+17	1.55391e+16	1.51962e+16	2.16284e+17	4.21992e+15	1.12022e+14
																																										SD	1.3227e+16	4.00895e+15	6648458206258019	4.55569e+16	3.40498e+15	2.2829e+13
11202022 V15 pg226, N74Q, MNE																																										WT Virus "Final Batch" V15 p117 ASB Yellow tape box 2021
																																												Avg molarity of overall particles	SD of overall particles
																																											WT virus elisa titer on V16 pg 173 11/09/2022	1.88357e-12	3.30133e-14
																																										3t3 DC-SIGN Capture	3t3 DC-SIGN Mannan	3t3 WT Neg Ctrl	Direct Infect 293t hACE2 Positive Ctrl	Direct Infect 293Ft Neg Ctrl Cells	Virus-only Neg Ctrl
																																										62865	21007	10430	384955	62346	15
																																										161144	20423	5455	501886	29090	28
																																										177080	18913	13142	404467
																																									avg	133696	20114.3	9675.67	430436	45718	21.5
																																									sd	50506.1	882.294	3183.21	51146.9	16628	6.5
																																									Signal per mole of virion	3t3 DC-SIGN	3t3 DC SIGN Mannan	3t3 WT Neg Ctrl	293t Pos Ctrl	Neg Ctrl Virus	293Ft direct infect neg ctrl
																																										3.33755e+16	1.11528e+16	5537367976549540	2.04376e+17	3.31e+16	7.96362e+12
																																										8.55526e+16	1.08427e+16	2.8961e+15	2.66455e+17	1.54441e+16	1.48654e+13
																																										9.40131e+16	1.00411e+16	6977189832005182	2.14735e+17
																																									Avg	7.09804e+16	1.06789e+16	5136886553381383	2.28522e+17	2.4272e+16	1.14145e+13
																																									SD	2.68141e+16	4.68417e+14	1.68999e+15	2.71543e+16	8827934296650589	3.4509e+12
12112022 V16 pg185
																																										WT Virus "Final Batch" V15 p117 ASB Yellow tape box 2021
																																												Avg molarity of overall particles	SD of overall particles
																																											WT virus elisa titer on V16 pg 173 11/09/2022	1.88357e-12	3.30133e-14
																																										3t3 DC-SIGN Capture	3t3 DC-SIGN Mannan	3t3 WT Neg Ctrl	Direct Infect 293t hACE2 Positive Ctrl	Direct Infect 293Ft Neg Ctrl Cells	Virus-only Neg Ctrl
																																										43875	42	5226	191367	71	11203
																																										36221	15759	7534	180346	78	2492
																																										51634	682	5282	268609
																																									avg	43910	5494.33	6014	213441	74.5	6847.5
																																									sd	6292.38	7262.92	1075.05	39268.5	3.5	4355.5
																																									Signal per mole of virion	3t3 DC-SIGN	3t3 DC SIGN Mannan	3t3 WT Neg Ctrl	293t Pos Ctrl	Neg Ctrl Virus	293Ft direct infect neg ctrl
																																										2.32936e+16	2.22981e+13	2.77452e+15	1.01598e+17	3.76945e+13	5947759677975503
																																										1.923e+16	8366575449898772	3999859092552659	9.57471e+16	4.14108e+13	1.32302e+15
																																										2.74129e+16	3.62079e+14	2804254808450112	1.42607e+17
																																									Avg	2.33122e+16	2916984223632664	3.19288e+15	1.13317e+17	3.95526e+13	3635390912696354
																																									SD	3.34067e+15	3855938811473691	5.7075e+14	2.0848e+16	1.85818e+12	2.31237e+15
7/17/2023 V16 p201
																																										WT
																																										3t3 trans infect	3t3 trans mannan	3t3 WT Neg Ctrl	293t hACE2 Direct Pos Ctrl	293Ft direct neg ctrl	Virus-only neg ctrl
																																										40313	774	36	343646	17734	19
																																										38580	96	765	248046	28042	15
																																										39917	551	1046	261961
																																									Avg	39603.3	473.667	615.667	284551	22888	17
																																									SD	741.446	282.142	425.637	42170.9	5154	2
																																										V15 p117 "Final Batch" ASB Yellow Tape Box
																																											Avg molarity of overall particles	SD of overall particles
																																										WT virus elisa titer on V16 pg 173 11/09/2022	1.88357e-12	3.30133e-14
																																										3t3 trans infect	3t3 trans mannan	3t3 WT Neg Ctrl	293t hACE2 Direct Pos Ctrl	293Ft direct neg ctrl	Virus-only neg ctrl
																																										2.14025e+16	4.10923e+14	1.91127e+13	1.82444e+17	9415118283425650	1.00872e+13
																																										2.04824e+16	5.09671e+13	4.06144e+14	1.3169e+17	1.48877e+16	7.96362e+12
																																										2.11922e+16	2.9253e+14	5.5533e+14	1.39077e+17
																																										2.10257e+16	2.51473e+14	3.26862e+14	1.5107e+17	1.21514e+16	9.02543e+12
																																										3.93639e+14	1.49791e+14	2.25974e+14	2.23888e+16	2736298614682293	1.06182e+12
7/27/2023 V16 p209, plate 1
																																										WT Virus "Final Batch" V15 p117 ASB Yellow tape box 2021
																																										WT virus
																																										WT Virus Trans Infect	WT Virus Trans Infect Mannan	WT Virus 3t3 WT Neg Ctrl	WT Virus Pos Ctrl 293t hACE2	WT Virus-Only Neg Ctrl	WT Virus 293Ft Infect Cells
																																										13801	13	13	36876	32	8930
																																										11563	17	236	51975	26	2100
																																										7350	4426	25	39926
																																									Avg	10904.7	1485.33	91.3333	42925.7	29	5515
																																									SD	2674.43	2079.37	102.412	6518.87	3	3415
																																										Wild-Type 400 uL aliquot"Final Batch" 8/29/2022. V15 p117. Yellow tape box 2021
																																										V15 p117 "Final Batch" ASB Yellow Tape Box
																																											Avg molarity of overall particles	SD of overall particles
																																										WT virus elisa titer on V16 pg 173 11/09/2022	1.88357e-12	3.30133e-14
																																										WT virus
																																										WT Virus Trans Infect	WT Virus Trans Infect Mannan	WT Virus 3t3 WT Neg Ctrl	WT Virus Pos Ctrl 293t hACE2	WT Virus-Only Neg Ctrl	WT Virus 293Ft Infect Cells
																																										7327058048356682	6.9018e+12	6.9018e+12	1.95778e+16	1.6989e+13	4741006330832923
																																										6138886472947491	9.02543e+12	1.25294e+14	2.75939e+16	1.38036e+13	1114906304003263
																																										3.90217e+15	2.3498e+15	1.32727e+13	2.1197e+16
																																									Avg	5789372195105197	788574998514054	4.84896e+13	2.27896e+16	1.53963e+13	2927956317418093
																																									SD	1.41988e+15	1.10395e+15	5.43713e+13	3.46092e+15	1.59272e+12	1.81305e+15
7/27/2023 V16 p209, plate 2
																																										WT virus
																																										WT Virus Trans Infect	WT Virus Trans Infect Mannan	WT Virus 3t3 WT Neg Ctrl	WT Virus Pos Ctrl 293t hACE2	WT Virus-Only Neg Ctrl	WT Virus 293Ft Infect Cells
																																										13921	23	15	61250	19	3848
																																										10013	17	15	69701	15	232
																																										21507	17	21	29830
																																									Avg	15147	19	17	53593.7	17	2040
																																									SD	4771.81	2.82843	2.82843	17154	2	1808
																																										Wild-Type 400 uL aliquot"Final Batch" 8/29/2022. V15 p117. Yellow tape box 2021
																																										V15 p117 "Final Batch" ASB Yellow Tape Box
																																											Avg molarity of overall particles	SD of overall particles
																																										WT virus elisa titer on V16 pg 173 11/09/2022	1.88357e-12	3.30133e-14
																																										WT virus
																																										WT Virus Trans Infect	WT Virus Trans Infect Mannan	WT Virus 3t3 WT Neg Ctrl	WT Virus Pos Ctrl 293t hACE2	WT Virus-Only Neg Ctrl	WT Virus 293Ft Infect Cells
																																										7390766980014012	1.22109e+13	7.96362e+12	3.25181e+16	1.00872e+13	2.04293e+15
																																										5315979439040320	9.02543e+12	7.96362e+12	3.70048e+16	7.96362e+12	123170601204170
																																										1.14182e+16	9.02543e+12	1.11491e+13	1.5837e+16
																																									Avg	8041659898446392	1.00872e+13	9.02543e+12	2.84533e+16	9.02543e+12	1.08305e+15
																																									SD	2.53339e+15	1.50163e+12	1.50163e+12	9107183179888340	1.06182e+12	9.59881e+14

## Sheet: Raji Direct Infect
	2021-12-29	V14 p22
			Neg Ctrl (Virus Only)	10.5 uM Grft	5.25 uM Grft	2.62 uM Grft	0 uM Grft	Neg Ctrl No Transfer (Bald Raji)								293t hACE2 Pos ctrl	Raji WT
		Neg Ctrl Bald virus	Neg Ctrl CoV2 Virus	Hi Grft CoV2 Raji DC SIGN	Med Grft CoV Raji DC SIGN	Lo Grft CoV2 Raji DC SIGN	No Grft CoV2 Raji DC SIGN	0uM Grft, Bald Raji DC SIGN	Bald virus No Grft Direct Infect	CoV2 Direct Infect 293t hACE2	No Grft CoV2 Raji WT (bald cells)						Norm to Direct infect
		48	75	77061	108590	41896	609	19	453	778663	36					1.25849	5.81837e-05
		121	144	70303	57105	134611	701	19	96	705140	12588					1.13966	0.0203449
		75	96	43848	96961	35596	20409	15	151	372386	5413					0.601856	0.00874857
	Avg	81.3333	105	63737.3	87552	70701	7239.67	17.6667	233.333	618730	6012.33
	SD	30.1367	28.8791	14331.9	22046.5	45264.3	9312.2	1.88562	156.942	176758	5141.83
	normalize to positive control Trans-Infection
		Neg Ctrl Bald virus	Neg Ctrl CoV2 Virus	Hi Grft CoV2 Raji DC SIGN	Med Grft CoV Raji DC SIGN	Lo Grft CoV2 Raji DC SIGN	No Grft CoV2 Raji DC SIGN	0uM Grft, Bald Raji DC SIGN	Bald virus No Grft Direct Infect	CoV2 Direct Infect 293t hACE2	No Grft CoV2 Raji WT (bald cells)
		0.00663014	0.0103596	10.6443	14.9993	5.78701	0.0841199	0.00262443	0.0625719	107.555	0.0049726
		0.0167135	0.0198904	9.71081	7.88779	18.5935	0.0968277	0.00262443	0.0132603	97.3995	1.73875
		0.0103596	0.0132603	6.05663	13.393	4.9168	2.81905	0.00207192	0.0208573	51.4369	0.747686
	Avg	0.0112344	0.0145034	8.8039	12.0934	9.76578	1	0.00244026	0.0322298	85.4638	0.830471
	SD	0.00416272	0.003989	1.97964	3.04524	6.25227	1.28627	0.000260456	0.0216781	24.4153	0.71023
	2022-02-17	V14 p22										Bald Cells Raji WT Direct infect								293t hACE2 Pos ctrl	Raji WT
		Virus-only Negative Control	4.7 uM Grft SARS-CoV-2 virus Trans Infection	0.47 uM Grft Trans Infection	0.047 uM Grft Trans Infection	0 uM Grft Positive Control Trans Infection	Direct Infection 4.9 uM Grft	Direct Infection 0.49 uM Grft direct Infection	88.2 uM Mannan Trans Infection	8.82 uM Mannan Trans Infection	Direct Infect Mannan 0.075 M	Negative Control Trans-Infection Raji WT Cells	Negative Control Trans Infection 293Ft cells	Direct Infect Mannan 0.0375 M	0.088 uM Mannan Trans Infection (cells dying)	Direct Infect 0 uM Grft (pos Ctrl) (Cells dying)					Norm to Direct infect
		142	43744	94428	82536	6761	1076996	1330446	7782	9469	708851	44	21	1424680	8703	1150617				1.30881	5.00495e-05
		173	52682	73882	105053	2434	739546	1342800	648	321	476711	8530	21	701867	9955	794461				0.90369	0.00970277
		276	13780	57328	58975	14132	813409	1441957	86	144	512953	6073	171	1713592	873	692313				0.787498	0.00690796
	Avg	197	36735.3	75212.7	82188	7775.67	876650	1.37173e+06	2838.67	3311.33	566172	4882.33	71	1.28005e+06	6510.33	879130
	SD	57.2771	16637	15175.2	18812.9	4829.28	144840	49910.4	3502.99	4354.73	101969	3565.23	70.7107	425508	4018.83	196447
		Normalize to positive control trans-infection
		Virus-only Negative Control	4.7 uM Grft SARS-CoV-2 virus Trans Infection	0.47 uM Grft Trans Infection	0.047 uM Grft Trans Infection	0 uM Grft Positive Control Trans Infection	Direct Infection 4.9 uM Grft	Direct Infection 0.49 uM Grft direct Infection	88.2 uM Mannan Trans Infection	8.82 uM Mannan Trans Infection	Direct Infect Mannan 0.075 M	Negative Control Trans-Infection Raji WT Cells	Negative Control Trans Infection 293Ft cells	Direct Infect Mannan 0.0375 M	0.088 uM Mannan Trans Infection (cells dying)	Direct Infect 0 uM Grft (pos Ctrl) (Cells dying)
		0.0182621	5.62576	12.144	10.6147	0.869507	138.509	171.104	1.00081	1.21777	91.1627	0.00565868	0.00270073	183.223	1.11926	147.977
		0.0222489	6.77524	9.50169	13.5105	0.313028	95.1103	172.693	0.0833369	0.0412826	61.3081	1.09701	0.00270073	90.2645	1.28028	102.173
		0.0354953	1.7722	7.37274	7.58456	1.81746	104.61	185.445	0.0110601	0.0185193	65.969	0.781026	0.0219917	220.379	0.112273	89.0358
	Avg	0.0253354	4.7244	9.67283	10.5699	1	112.743	176.414	0.365071	0.425858	72.8133	0.627899	0.00913105	164.622	0.83727	113.062
	SD	0.0073662	2.13962	1.95163	2.41945	0.621076	18.6273	6.41879	0.450506	0.560046	13.1138	0.458511	0.00909384	54.7231	0.516847	25.2644
	05/14/2022 V14 p179
		virus only negative control	positive control Direct Infect 293t hACE2 100 uL media + 30 uL virus	positive control Direct Infect 293t hACE2 replace with 25 uL media + 25 uL virus	4.6 uM Q-Grft Trans Assay	0.46 uM Q-Grft Trans Assay	0.046 uM Q-Grft Trans Assay	4.6 uM Grft-L-Grft Trans Assay	0.46 uM Grft-L-Grft Trans Assay	0.046 uM Grft-L-Grft Trans Assay	Control 0 uM Grft Raji DC-SIGN	Control 0 uM Grft Raji WT	Direct Infect Raji WT	Direct Infect Raji DC SIGN	Direct Infect 293Ft cells					293t hACE2 Pos ctrl	Norm to Direct infect Raji WT	Norm to Direct infect Raji Dc-SIGN
		130	938650	2004280	13132	39169	80590	19619	37250	394	84	19	103	75	44809					1.05376	5.4153e-05	3.94318e-05
		105	758361	1982226	25701	27871	41413	22588	1990	21507	23	26	86	103	15557					1.04217	4.52151e-05	5.4153e-05
		148	799223	1719551	7951	7959	12184	13476	19876	6963	288	26	96	226	45436					0.904066	5.04727e-05	0.000118821
	Avg	127.667	832078	1902019	15594.7	24999.7	44729	18561	19705.3	9621.33	131.667	23.6667	95	134.667	35267.3
	SD	17.632	77182.1	129338	7452.7	12902.2	28024.9	3794.44	14395.3	8821.93	113.315	3.29983	6.97615	65.5862	13939.7
					42559	56019	18188	1898	1288	725	390	19
					47476	35040	31782	17244	6617	440	132	19
					27309	10488	46417	39192	10271	6948	30	1801
	Avg				39114.7	33849	32129	19444.7	6058.67	2704.33	184	613
	SD				8585.82	18607	11527.1	15304.5	3688.48	3002.98	151.499	840.043

## Sheet: Mannan Inhibit Raji Trans
	Mannan inhibition of Raji Trans Infection
	conc (ug/mL)							avg	sd
	250	0.0760626	0.14094	0.0805369				0.0991797	0.0295851
	58.82	0.0760626	0.0626398	0.0626398	1.00081	0.0833369	0.0110601	0.216092	0.00632758
	5.88	1.21777	0.0412826	0.0185193				0.425858	0.560046
	2.5	0.0425056	0.742729	0.111857				0.299031	0.315017
	0.055	1.11926	1.28028	0.112273				0.83727	0.516847
	0

## Sheet: Raji vMIP Trans Infect
	2022-01-13	V14 p48, 50
							72.7 uM	7.27 uM	0.727 uM	Trans Infect Pos Ctrl Old Raji DC SIGN				Trans Infect Pos Ctrl Fresh Raji DC SIGN
		CoV2 delta virus only neg ctrl					vMIPII 72.7 uM Trans	vMIPII 7.27 uM trans	vMIPII 0.727 uM Trans	vMIPII 0 uM trans	Raji WT Trans infect Neg Ctrl (No viral transfer)	0 uM Inhibitor Trans infect 293Ft cells (neg ctrl, no hACE2)		Test New Flask Raji DC-SIGN Trans Infect
		76					2409280	119275	40746	45465	19	898		930
		100					199805	16701	4996	16928	23	84		11909
		119					602159	16967	2021	12538	15	103		4423
	Avg	98.3333					1.07041e+06	50981	15921	24977	19	361.667		5754
	SD	17.5942					960865	48291.3	17595.9	14597.6	3.26599	379.324		4579.9
	2022-02-11	V14 p63, 64, 66, 67
		Normalize to positive control trans-infection
								V14 p63, 64, 66, 67
								Normalize to positive control trans-infection
								4.7 uM Griffithsin	0.47 uM Griffithsin	0.005 uM Griffithsin	47.1 uM vMIPII L13F	0.47 uM vMIPII L13F	250 ug/mL Mannan	50 ug/mL Mannan	2.5 ug/mL Mannan	Positive Ctrl Old Cells	Positive Ctrl New Cells	Neg Ctrl Bald Cells	Neg Ctrl 293Ft cells
											165.913	0.0760626				0.098434	1.41387	0.0715884	0.0514541
											78.7494	16.557				0.0581655	0.154362	0.0559284	0.033557
											145.895	1.67338				0.0850112	1.43177	0.0715884	0.0671141
							Avg				130.186	6.10216				0.0805369	1	0.0663684	0.0507084
							SD				37.2777	7.42142				0.0167412	0.598001	0.00738217	0.0137098

## Sheet: 3t3 Trans Grft
3t3 Cells Grft Test
04242022 V14 p148
					Q Grft (in nM) pre-incubate virus with grft					Q Grft (in nM) grft with cells					Grft L Grft 3A onearmed (in nM) pre-incubate virus with grft					Grft L Grft 3A onearmed (in nM) grft with cells
					1000	200	2	0.2	0	1000	200	2	0.2	0	1000	200	2	0.2	0	1000	200	2	0.2	0
	virus only neg ctrl	Direct infect 3t3 DC SIGN cells Neg Ctrl	293t hACE2 BEI Pos Ctrl	Trans Infect Neg Ctrl 3t3 WT Cells	Q Grft pre 1000	Q Grft pre 200	Q Grft pre 2	Q Grft pre 0.2	Q Grft pre 0	Q Grft cells 1000	Q Grft cells 200	Q Grft cells 2	Q Grft cells 0.2	Q Grft cells 0	GLG3A pre 1000	GLG3A pre 200	GLG3A pre 2	GLG3A pre 0.2	GLG3A pre 0	GLG3A cells 1000	GLG3A cells 200	GLG3A cells 2	GLG3A cells 0.2	GLG3A cells 0
	498	115	2814534	45090	823261	744567	1330519	1775488	1431453	1228992	1421259	1616898	1277288	1447340	634386	803194	1267053	1034321	1252444	632465	630769	925553	756019	1158623
	571	92	2530876	38232	740061	1054978	1751205	1639698	1253605	931680	1405198	1444746	1067382	880957	587136	958540	1045130	1088507	1328282	939817	893986	1355357	1204551	1363648
	765	144	2547342	24515	666976	813476	1461053	1548105	1024294	1128353	1412380	1499344	1568115	1678388	562236	810398	952523	842090	1095034	719503	1501003	1353042	1049892	1092123
Avg	611.333	117	2.63092e+06	35945.7	743433	871007	1514259	1.65443e+06	1.23645e+06	1.09634e+06	1.41295e+06	1.52033e+06	1.30426e+06	1.33556e+06	594586	857377	1.08824e+06	988306	1.22525e+06	763928	1008586	1.21132e+06	1.00349e+06	1204798
SD	112.672	21.276	130010	8553.87	63847.6	133094	175817	93411.4	166664	123470	6569.06	71830.2	205311	335007	29922.5	71593.2	131974	105730	97144.8	129348	364396	202068	186029	115558
normalize to 0 mM Grft
					0.665826	0.602181	1.07608	1.43596	1.15771	0.920206	1.06417	1.21065	0.956368	1.08369	0.517759	0.655533	1.03412	0.844169	1.02219	0.524955	0.523548	0.768223	0.627507	0.961674
					0.598537	0.853231	1.41632	1.32613	1.01387	0.697594	1.05214	1.08175	0.799201	0.659615	0.479196	0.78232	0.852991	0.888393	1.08409	0.780062	0.742021	1.12497	0.999795	1.13185
					0.539428	0.657912	1.18165	1.25206	0.828415	0.844853	1.05752	1.12263	1.17412	1.25669	0.458873	0.661413	0.777409	0.687278	0.89372	0.597198	1.24585	1.12304	0.871426	0.906478
Avg	#DIV/0!	#DIV/0!	#DIV/0!	#DIV/0!	0.601264	0.704441	1.22468	1.33805	1	0.820884	1.05794	1.13834	0.976564	1	0.485276	0.699755	0.888172	0.806614	1	0.634072	0.837141	1.00541	0.832909	1
SD	#DIV/0!	#DIV/0!	#DIV/0!	#DIV/0!	0.0516378	0.107642	0.142195	0.075548	0.134792	0.0924478	0.00491858	0.0537828	0.153727	0.250836	0.0244215	0.0584314	0.107712	0.0862927	0.0792854	0.107361	0.302454	0.167719	0.154407	0.095915
051322 V14 p180
					Q Grft Pre-incubate virus and Grft					Q Grft Pre-incubate cells and Grft					Grft -L -Grft 3A (Onearmed) Pre-incubate virus and Grft					Grft -L -Grft 3A (Onearmed) Pre-incubate cells and Grft
	Virus-only Control	Direct Infect 3t3 DC SIGN Cells	Direct Infect 3t3 WT Cells	Positive Control Direct Infect 293t hACE2 cells	1000 nM	200 nM	2 nM	0.2 nM	0 nM	1000 nM	200 nM	2 nM	0.2 nM	0 nM	1000 nM	200 nM	2 nM	0.2 nM	0 nM	1000 nM	200 nM	2 nM	0.2 nM	0 nM			Tran Infect Neg Ctrl 3t3 WT cells
	167	103	688	1144857	717967	878234	732728	1141098	715701	931857	1124561	810823	992025	877305	822434	498880	1036159	1018569	605055	1274657	998598	1251998	1017063	1183282			22915
	173	101	757	1590625	1057353	811925	764657	806251	884571	1073803	947582	792792	861992	989782	933767	708628	698955	1338750	696175	954632	666776	1194653	1231490	971621			22323
	61	101	576	1089557	1100500	875113	975367	741961	1165565	1403298	1430367	1379846	1143948	1226815	1145307	443830	899434	919344	630571	1375128	1211242	1203301	922944	1405863			84240
Avg	133.667	101.667	673.667	1275013	958607	855091	824251	896437	921946	1.13632e+06	1.1675e+06	994487	999322	1.0313e+06	967169	550446	878183	1092221	643934	1.20147e+06	958872	1.21665e+06	1.05717e+06	1186922			43159.3
SD	51.4414	0.942809	74.5848	224310	171067	30549.3	107647	174981	185548	197476	199421	272589	115224	145676	133912	114087	138481	178967	38380.8	179297	224045	25242.5	129116	177297			29049.4
normalize to 0 mM Grft
					0.778752	0.952588	0.794763	1.23771	0.776294	0.903575	1.09043	0.786214	0.961916	0.850678	1.2772	0.774738	1.60911	1.58179	0.939623	1.07392	0.841334	1.05483	0.856891	0.996933
					1.14687	0.880665	0.829395	0.87451	0.959461	1.04121	0.918822	0.76873	0.83583	0.959741	1.4501	1.10047	1.08545	2.07902	1.08113	0.804292	0.561769	1.00651	1.03755	0.818606
					1.19367	0.949202	1.05794	0.804777	1.26424	1.36071	1.38695	1.33797	1.10923	1.18958	1.77861	0.689248	1.39678	1.4277	0.979248	1.15857	1.02049	1.0138	0.777594	1.18446
Avg	#DIV/0!	#DIV/0!	#DIV/0!	#DIV/0!	1.03976	0.927485	0.894034	0.972331	1	1.10183	1.13207	0.964304	0.968992	1	1.50197	0.854818	1.36378	1.69617	1	1.01226	0.807864	1.02505	0.890678	1			#DIV/0!
SD	#DIV/0!	#DIV/0!	#DIV/0!	#DIV/0!	0.18555	0.0331357	0.116761	0.189796	0.201257	0.191483	0.193369	0.264316	0.111727	0.141254	0.207959	0.177172	0.215054	0.277928	0.0596037	0.151061	0.188762	0.0212672	0.108782	0.149376			#DIV/0!
2022-07-18	V15 p54
				Virus-only Neg Ctrl	Positive Ctrl 293t hACE2 BEI (virus sol'n with cells added over top)	Pre-incubate 1000 nM Grft WT Rep 1	Pre-incubate 200 nM Grft WT Rep 1	Pre-incubate 2 nM Grft WT Rep 1	Pre-incubate 0.2 nM Grft WT Rep 1	Pre-incubate 0 nM Grft WT Rep 1		Pre-incubate 1000 nM Grft WT Rep 2	Pre-incubate 200 nM Grft WT Rep 2	Pre-incubate 2 nM Grft WT Rep 2	Pre-incubate 0.2 nM Grft WT Rep 2	Pre-incubate 0 nM Grft WT Rep 2
				19	36125	81215	103809	82573	211273	63169		56007	185375	80615	200882	204384
				28	38294	125851	133530	192332	220076	236540		76426	138159	73069	145959	61188
				28	32228	129688	248136	224809	292965	170873		51575	129998	227215	72288	186903
			Avg	25	35549	112251	161825	166571	241438	156861		61336	151177	126966	139710	150825
			SD	4.24264	2509.7	22001.8	62225.5	60857.6	36611.9	71468.6		10822.6	24409.8	70953.4	52683.9	63783.4
		norm to 0 nM		0.000121127	0.2303	0.517752	0.661791	0.52641	1.34688	0.402708		0.371338	1.22907	0.534494	1.33189	1.35511
				0.000178502	0.244127	0.802311	0.851265	1.22613	1.403	1.50796		0.50672	0.916022	0.484462	0.967737	0.405689
				0.000178502	0.205456	0.826772	1.58189	1.43318	1.86768	1.08933		0.341953	0.861913	1.50648	0.479284	1.2392
			Avg	0.000159377	0.226628	0.715612	1.03165	1.06191	1.53919	1		0.40667	1.00234	0.841812	0.926303	1
			SD	2.70472e-05	0.0159996	0.140264	0.396693	0.387973	0.233404	0.455618		0.0717557	0.161842	0.470435	0.349305	0.422897
				Direct Infect 3t3 Cells	Trans-Infect 3t3 WT Cells Neg Ctrl 0 nM Grft	Direct Addition 1000 nM Grft WT Rep 1	Direct Addiiton 200 nM Grft WT Rep 1	Direct Infect 2 nM Grft WT Rep 1	Direct Infect 0.2 nM Grft WT Rep 1	Direct Infect 0 nM Grft WT Rep 1		Direct Infect 1000 nM Grft WT Rep 2	Direct Infect 200 nM Grft WT Rep 2	Direct Infect 2 nM Grft WT Rep 2	Direct Infect 0.2 nM Grft WT Rep 2	Direct Infect 0 nM Grft WT Rep 2
				40	16084	45069	91628	138153	61819	61219		85695	157631	135956	155071	42152
				40	15575	33557	140878	144169	196673	142080		85413	210951	126793	104975	220612
					27250	168590	95013	207496	284450	73742		161388	116546	68990	83692	150984
			Avg	40	19636.3	82405.3	109173	163273	180981	92347		110832	161709	110580	114579	137916
			SD	0	5387.68	61122.7	22461.4	31366.9	91563.6	35536.2		35748.7	38648.4	29645.3	29921.3	73439.6
		norm to 0 nM		0.000433149	0.174169	0.48804	0.992214	1.49602	0.669421	0.662924		0.621356	1.14295	0.985788	1.12439	0.305635
				0.000433149	0.168657	0.363379	1.52553	1.56117	2.12972	1.53854		0.619312	1.52956	0.919349	0.761152	1.59961
					0.295083	1.82561	1.02887	2.24692	3.08023	0.798532		1.17019	0.845051	0.500232	0.606833	1.09475
			Avg	0.000433149	0.212636	0.892344	1.1822	1.76803	1.95979	1		0.80362	1.17252	0.80179	0.830791	1
			SD	0	0.0583417	0.661881	0.243228	0.339664	0.991516	0.384812		0.259206	0.280232	0.214952	0.216953	0.532495
	Overall averages and stuff, normalized to 0 nM Grft
	Q Grft in nM										Grft-L-Grft 3A OneArm in nM
	1000	200	2	0.2							1000	200	2	0.2
pre incubate 04242022 V14 p148	0.665826	0.602181	1.07608	1.43596						pre incubate 04242022 V14 p148	0.517759	0.655533	1.03412	0.844169
	0.598537	0.853231	1.41632	1.32613							0.479196	0.78232	0.852991	0.888393
	0.539428	0.657912	1.18165	1.25206							0.458873	0.661413	0.777409	0.687278
grft in wells 04242022 V14 p148	0.920206	1.06417	1.21065	0.956368						grft in wells 04242022 V14 p148	0.524955	0.523548	0.768223	0.627507
	0.697594	1.05214	1.08175	0.799201							0.780062	0.742021	1.12497	0.999795
	0.844853	1.05752	1.12263	1.17412							0.597198	1.24585	1.12304	0.871426
pre incubate 05132022 V14 p180	0.778752	0.952588	0.794763	1.23771						pre incubate 05132022 V14 p180	1.2772	0.774738	1.60911	1.58179
	1.14687	0.880665	0.829395	0.87451							1.4501	1.10047	1.08545	2.07902
	1.19367	0.949202	1.05794	0.804777							1.77861	0.689248	1.39678	1.4277
grft in wells 05132022 V14 p180	0.903575	1.09043	0.786214	0.961916						grft in wells 05132022 V14 p180	1.07392	0.841334	1.05483	0.856891
	1.04121	0.918822	0.76873	0.83583							0.804292	0.561769	1.00651	1.03755
	1.36071	1.38695	1.33797	1.10923							1.15857	1.02049	1.0138	0.777594
Avg	0.890936	0.955484	1.05534	1.06398						Avg	0.908394	0.799895	1.0706	1.05659
SD	0.243799	0.197222	0.210049	0.210963						SD	0.417011	0.210005	0.230212	0.409108
	89.0936	95.5484	105.534	106.398							90.8394	79.9895	107.06	105.659
	24.3799	19.7222	21.0049	21.0963							41.7011	21.0005	23.0212	40.9108
	Average without pre-incubation
	Q Grft in nM										Grft-L-Grft 3A OneArm in nM
	1000	200	2	0.2							1000	200	2	0.2
grft in wells 04242022 V14 p148	0.920206	1.06417	1.21065	0.956368						grft in wells 04242022 V14 p148	0.524955	0.523548	0.768223	0.627507
	0.697594	1.05214	1.08175	0.799201							0.780062	0.742021	1.12497	0.999795
	0.844853	1.05752	1.12263	1.17412							0.597198	1.24585	1.12304	0.871426
grft in wells 05132022 V14 p180	0.903575	1.09043	0.786214	0.961916						grft in wells 05132022 V14 p180	1.07392	0.841334	1.05483	0.856891
	1.04121	0.918822	0.76873	0.83583							0.804292	0.561769	1.00651	1.03755
	1.36071	1.38695	1.33797	1.10923							1.15857	1.02049	1.0138	0.777594
Avg	0.961358	1.095	1.05132	0.972778						Avg	0.823165	0.822503	1.01523	0.861794
SD	0.205764	0.14171	0.209643	0.134431						SD	0.230064	0.252525	0.119948	0.136645
	96.1358	109.5	105.132	97.2778							82.3165	82.2503	101.523	86.1794
	20.5764	14.171	20.9643	13.4431							23.0064	25.2525	11.9948	13.6645

## Sheet: Raji GLG 3A
Raji Delta GLG-3A Onearmed Test
04/07/2022 V14 pg 132
	Trans infect 1000 nM	Trans infect 200 nM	Trans infect 20 nM	Trans infect 2 nM	Trans infect 0 nM	Direct infect 293t hACE2 cells		Trans Infect Raji WT 0 nM GLG-3a	Trans Infect Raji WT 1000 nM GLG-3a		Direct infect 293Ft cells 10 uL virus, no Grft	Direct infect 293Ft WT cells Neg Ctrl; 30 uL virus
	9171	4999	14698	14136	2516	51641		23	94		3328	5957
	9372	6488	5181	35183	675	24801		16	133		14176	4709
	8160	8848	18458	14992	343	54175		26	1730		766	1868
Avg	8901	6778.33	12779	21437	1178	43539		21.6667	652.333		6090	4178
SD	530.353	1584.7	5587.58	9726.17	955.768	13290.1		4.18994	762.192		5812.54	1711.03
			Normalize to positive ctrl direct-infection
				0.210639	0.114817	0.337582	0.324674	0.0577873	1.18609		0.000528262	0.00215898
				0.215255	0.149016	0.118997	0.80808	0.0155033	0.569627		0.000367487	0.00305473
				0.187418	0.20322	0.423942	0.344335	0.00787799	1.24429		0.000597166	0.0397345
			Avg	0.204437	0.155684	0.293507	0.492363	0.0270562	1		0.000497638	0.0149827
			SD	0.0121811	0.0363973	0.128335	0.22339	0.021952	0.305246		9.62341e-05	0.017506
			Normalize to positive ctrl trans-infection
				Trans infect 1000 nM	Trans infect 200 nM	Trans infect 20 nM	Trans infect 2 nM	Trans infect 0 nM	Direct infect 293t hACE2 cells
				7.78523	4.24363	12.4771	12	2.13582	43.8379
				7.95586	5.50764	4.39813	29.8667	0.573005	21.0535
				6.92699	7.51104	15.6689	12.7267	0.291171	45.989
			Avg	7.55603	5.7541	10.848	18.1978	1	36.9601
			SD	0.450215	1.34525	4.74328	8.25651	0.811348	11.2819
				Concentration in nM
				1000	200	20	2
			percent Infectivity	778.523	424.363	1247.71	1200
				795.586	550.764	439.813	2986.67
				692.699	751.104	1566.89	1272.67
			Avg	755.603	575.41	1084.8	1819.78
			SD	45.0215	134.525	474.328	825.651
				Concentration in nM
				1000	200	20	2
				7.55603	5.7541	10.848	18.1978
				0.450215	1.34525	4.74328	8.25651
Raji Delta GLG-3A Onearmed Test Rep 2
5/14/2022	V14 170, p179						0.470588
																			4.7 uM	0.47 uM	0.047 uM
	virus only negative control	positive control Direct Infect 293t hACE2 100 uL media + 30 uL virus	positive control Direct Infect 293t hACE2 replace with 25 uL media + 25 uL virus	4.6 uM Q-Grft Trans Assay	0.46 uM Q-Grft Trans Assay	0.046 uM Q-Grft Trans Assay	4.7 uM Grft-L-Grft Trans Assay	0.47 uM Grft-L-Grft Trans Assay	0.047 uM Grft-L-Grft Trans Assay	Control 0 uM Grft Raji DC-SIGN	Control 0 uM Grft Raji WT	Direct Infect Raji WT	Direct Infect Raji DC SIGN	Direct Infect 293Ft cells					Hi Grft CoV2 Raji DC SIGN	Med Grft CoV Raji DC SIGN	Lo Grft CoV2 Raji DC SIGN
	130	938650	2004280				19619	37250	394	84	19	103	75	44809					149.005	282.911	2.99241
	105	758361	1982226				22588	1990	21507	23	26	86	103	15557					171.554	15.1139	163.344
	148	799223	1719551				13476	19876	6963	288	26	96	226	45436					102.349	150.957	52.8835
Avg	127.667	832078	1902019	#DIV/0!	#DIV/0!	#DIV/0!	18561	19705.3	9621.33	131.667	23.6667	95	134.667	35267.3				avg	140.97	149.661	73.0734
SD	17.632	77182.1	129338	#DIV/0!	#DIV/0!	#DIV/0!	3794.44	14395.3	8821.93	113.315	3.29983	6.97615	65.5862	13939.7				sd	28.8185	109.332	67.002
							1898	1288	725	390	19								4.7 uM	0.47 uM	0.047 uM
							17244	6617	440	132	19								Hi Grft CoV2 Raji DC SIGN	Med Grft CoV Raji DC SIGN	Lo Grft CoV2 Raji DC SIGN
							39192	10271	6948	30	1801								10.3152	7	3.94022
Avg				#DIV/0!	#DIV/0!	#DIV/0!	19444.7	6058.67	2704.33	184	613								93.7174	35.962	2.3913
SD				#DIV/0!	#DIV/0!	#DIV/0!	15304.5	3688.48	3002.98	151.499	840.043								213	55.8207	37.7609
																		avg	105.678	32.9275	14.6975
																		sd	83.1768	20.0461	16.3205
							282.911	15.1139	150.957	7	35.962	55.8207		91.2942	97.8994
														#DIV/0!	#DIV/0!
							2.99241	163.344	52.8835	3.94022	2.3913	37.7609		43.8854	56.8309
							282.911	15.1139	150.957		35.962	55.8207		108.153	98.9739
														#DIV/0!	#DIV/0!
							2.99241	163.344	52.8835			37.7609		64.2453	60.0063

## Sheet: Raji Grft
Raji Grft Trans Infection Test																		Data for Graphpad prism
2021-12-29	V14 p21, 22		WT Grft KF
normalize to positive control Trans-Infection			10.5 uM	5.25 uM	2.62 uM													10.5 uM	5.25 uM	2.62 uM						Test graph
	Neg Ctrl Bald virus	Neg Ctrl CoV2 Virus	Hi Grft CoV2 Raji DC SIGN	Med Grft CoV Raji DC SIGN	Lo Grft CoV2 Raji DC SIGN	No Grft CoV2 Raji DC SIGN	0uM Grft, Bald virus Raji DC SIGN	Bald virus No Grft Direct Infect	CoV2 Direct Infect 293t hACE2	No Grft CoV2 Raji WT cells (bald cells)								Hi Grft CoV2 Raji DC SIGN	Med Grft CoV Raji DC SIGN	Lo Grft CoV2 Raji DC SIGN
	0.00663014	0.0103596	10.6443	14.9993	5.78701	0.0841199	0.00262443	0.0625719	107.555	0.0049726								10.6443	14.9993	5.78701					concentration in nM	avg	sd
	0.0167135	0.0198904	9.71081	7.88779	18.5935	0.0968277	0.00262443	0.0132603	97.3995	1.73875								9.71081	7.88779	18.5935					10500	8.8039	1.97964
	0.0103596	0.0132603	6.05663	13.393	4.9168	2.81905	0.00207192	0.0208573	51.4369	0.747686								6.05663	13.393	4.9168					5250	12.0934	3.04524
Avg	0.0112344	0.0145034	8.8039	12.0934	9.76578	1	0.00244026	0.0322298	85.4638	0.830471							avg	8.8039	12.0934	9.76578					4700	18.4707	23.7694
SD	0.00416272	0.003989	1.97964	3.04524	6.25227	1.28627	0.000260456	0.0216781	24.4153	0.71023							sd	1.97964	3.04524	6.25227					2620	9.76578	6.25227
																									470	9.53365	4.57045
																									47	10.5699	2.41945
2022-02-11	V14 p63, 64, 66, 67																								4.7	0.0939597	0.00632758
	Normalize to positive control trans-infection		WT KF Grft															4.7 uM	0.47 uM	0.0047 uM
	4.7 uM Griffithsin	0.47 uM Griffithsin	0.0047 uM Griffithsin	47.1 uM vMIPII L13F	0.47 uM vMIPII L13F	250 ug/mL Mannan	50 ug/mL Mannan	2.5 ug/mL Mannan	Positive Ctrl Old Cells	Positive Ctrl New Cells	Neg Ctrl Bald Cells	Neg Ctrl 293Ft cells						Hi Grft CoV2 Raji DC SIGN	Med Grft CoV Raji DC SIGN	Lo Grft CoV2 Raji DC SIGN
	69.5391	17.3535	0.098434	165.913	0.0760626	0.0760626	0.0760626	0.0425056	0.098434	1.41387	0.0715884	0.0514541						69.5391	17.3535	0.098434
	4.80984	2.35123	0.0850112	78.7494	16.557	0.14094	0.0626398	0.742729	0.0581655	0.154362	0.0559284	0.033557						4.80984	2.35123	0.0850112
	22.302	8.47875	0.098434	145.895	1.67338	0.0805369	0.0626398	0.111857	0.0850112	1.43177	0.0715884	0.0671141						22.302	8.47875	0.098434
Avg	32.217	9.39448	0.0939597	130.186	6.10216	0.0991797	0.0671141	0.299031	0.0805369	1	0.0663684	0.0507084					avg	32.217	9.39448	0.0939597
SD	27.3398	6.15877	0.00632758	37.2777	7.42142	0.0295851	0.00632758	0.315017	0.0167412	0.598001	0.00738217	0.0137098					sd	27.3398	6.15877	0.00632758
2022-02-18	V14 p72
	Normalize to positive control trans-infection			WT KF Grft														4.7 uM	0.47 uM	0.047 uM
	Virus-only Negative Control	4.7 uM Grft SARS-CoV-2 virus Trans Infection	0.47 uM Grft Trans Infection	0.047 uM Grft Trans Infection	0 uM Grft Positive Control Trans Infection													Hi Grft CoV2 Raji DC SIGN	Med Grft CoV Raji DC SIGN	Lo Grft CoV2 Raji DC SIGN
	0.0182621	5.62576	12.144	10.6147	0.869507													5.62576	12.144	10.6147
	0.0222489	6.77524	9.50169	13.5105	0.313028													6.77524	9.50169	13.5105
	0.0354953	1.7722	7.37274	7.58456	1.81746													1.7722	7.37274	7.58456
Avg	0.0253354	4.7244	9.67283	10.5699	1												avg	4.7244	9.67283	10.5699
SD	0.0073662	2.13962	1.95163	2.41945	0.621076												sd	2.13962	1.95163	2.41945
2022-03-21	V14 p116	delta virus; not sure if you should use this data			WT KF Grft
		Neg ctrl virus only	Trans assay delta spike Raji DC-SIGN 4.7 uM Grft 293t+ hACE2	Trans assay delta spike Raji DC-SIGN .47 uM Grft 293t+ hACE2	Trans assay delta spike Raji DC-SIGN .047 uM Grft 293t+ hACE2	Trans assay delta spike Raji DC-SIGN 0 uM Grft 293t+ hACE2	Trans assay delta spike Raji WT 4.7 uM Grft 293t+ hACE2	Trans assay delta spike Raji WT .47 uM Grft 293t+ hACE2	Trans assay delta spike Raji WT .047 uM Grft 293t+ hACE2	Trans assay delta spike Raji WT 0 uM Grft 293t+ hACE2		Direct Infect 293Ft 35 uL virus, supposed to be neg ctrl	Direct Infect 293Ft 15 uL virus, supposed to be neg ctrl
		1.15385	49.4056	532.657	536.245	44.0559	1.88811	1.27972	14.035	2.0979		259.762	114.566
		0.839161	101.58	164.958	92.3077	98.2657	68.9371	42.5874	341.266	0.314685		344.056	1.53147
		1.00699	626.895	23.3077	44.4965	398.476	4.74126	1.67832	359.413	0.272727		134.622
	Avg	1	259.294	240.308	224.35	180.266	25.1888	15.1818	238.238	0.895105		246.147	0
	SD	0.128565	260.805	214.659	221.405	155.877	30.9566	19.3794	158.708	0.850679		86.0412	0
2022-05-14	V14 p170, 179
					Q-Grft	4.70588	0.470588	0.0470588													4.7 uM	0.47 uM	0.047 uM
			virus only negative control	positive control Direct Infect 293t hACE2 100 uL media + 30 uL virus	positive control Direct Infect 293t hACE2 replace with 25 uL media + 25 uL virus	4.7 uM Q-Grft Trans Assay	0.47 uM Q-Grft Trans Assay	0.047 uM Q-Grft Trans Assay	4.6 uM Grft-L-Grft Trans Assay	0.46 uM Grft-L-Grft Trans Assay	0.046 uM Grft-L-Grft Trans Assay	Control 0 uM Grft Raji DC-SIGN	Control 0 uM Grft Raji WT	Direct Infect Raji WT	Direct Infect Raji DC SIGN	Direct Infect 293Ft cells					Hi Grft CoV2 Raji DC SIGN	Med Grft CoV Raji DC SIGN	Lo Grft CoV2 Raji DC SIGN
			130	938650	2004280	13132	39169	80590				84	19	103	75	44809		0.637975	0.144304		99.7367	297.486	612.076
			105	758361	1982226	25701	27871	41413				23	26	86	103	15557		0.174684	0.197468		195.197	211.678	314.529
			148	799223	1719551	7951	7959	12184				288	26	96	226	45436		2.18734	0.197468		60.3873	60.4481	92.5367
		Avg	127.667	832078	1902019	15594.7	24999.7	44729	#DIV/0!	#DIV/0!	#DIV/0!	131.667	23.6667	95	134.667	35267.3				avg	118.441	189.871	339.714				Test graph
		SD	17.632	77182.1	129338	7452.7	12902.2	28024.9	#DIV/0!	#DIV/0!	#DIV/0!	113.315	3.29983	6.97615	65.5862	13939.7				sd	56.6028	97.9913	212.847
																										concentration in nM	avg	sd
																										4700	165.51	70.044
																										470	186.916	99.6143
						42559	56019	18188				390	19					2.11957	0.103261		4.7 uM	0.47 uM	0.047 uM			47	257.164	177.282
						47476	35040	31782				132	19					0.717391	0.103261		Hi Grft CoV2 Raji DC SIGN	Med Grft CoV Raji DC SIGN	Lo Grft CoV2 Raji DC SIGN
						27309	10488	46417				30	1801					0.163043	9.78804		231.299	304.451	98.8478
		Avg				39114.7	33849	32129	#DIV/0!	#DIV/0!	#DIV/0!	184	613								258.022	190.435	172.728
		SD				8585.82	18607	11527.1	#DIV/0!	#DIV/0!	#DIV/0!	151.499	840.043								148.418	57	252.266
																				avg	212.58	183.962	174.614
																				sd	46.6621	101.125	62.647
nM	10500	5250	4700	2620	470	47	4.7
	Concentration
	10.5	5.25	4.7	2.62	0.47	0.047	0.005
2022-02-11	10.6443	14.9993	69.5391	5.78701	17.3535		0.098434
	9.71081	7.88779	4.80984	18.5935	2.35123		0.0850112
	6.05663	13.393	22.302	4.9168	8.47875		0.098434
2022-02-18			5.62576		12.144	10.6147
			6.77524		9.50169	13.5105
			1.7722		7.37274	7.58456
Avg	8.8039	12.0934	8.25701	9.76578	9.53365	10.5699	0.0939597
SD	1.97964	3.04524	7.2155	6.25227	4.57045	2.41945	0.00632758
	Concentration in nM
	10500	5250	4700	2620	470	47	5
Percent Infection	880.39	1209.34	825.701	976.578	953.365	1056.99	9.39597
SD	197.964	304.524	721.55	625.227	457.045	241.945	0.632758

## Sheet: All Raji Trans Grft
[Griffithsin], nM	Wild-Type Griffithsin								M78Q Griffithsin								Griffithsin-L-Griffithsin 3A Onearmed
10500	10.6443	9.71081	6.05663
5250	14.9993	7.88779	13.393
4700	69.5392	4.80984	22.302	5.62576	6.77524	1.77219			99.7367	195.197	60.3873	231.299	258.022	148.418			149.005	171.554	102.349	10.3152	93.7174	213
2620	5.78701	18.5935	4.9168
1000																	7.78523	7.95586	6.92699
470	17.3535	2.35123	8.47875	12.144	9.50169	7.37274			297.486	211.679	60.4481	304.451	190.435	57					282.911	15.1139	150.957	7	35.962	55.8207
200																	4.24363	5.50764	7.51104
47	10.6146	13.5105	7.58456						612.076	314.529	92.5367	98.8478	172.728	252.266					2.99241	163.344	52.8835	3.94022	2.3913	37.7609
20																	12.4771	4.39813	15.6689
4.7	0.098434	0.085011	0.098434
2																	12	29.8667	12.7267

## Sheet: Direct Grft & MNE
[WT-Griffithsin], nM		MNE Virus													M Virus													N Virus													E Virus
8000		0.004694	0.004694	0.013076	0.459391	0.414399	0.422522	0.002634	0.046529	0.019226	0.316356	0.433537	0.511552		0.210808	0.051252	0.175299	0.123115	0.114418	0.131144	0.012947	0.04436	0.003028					0.384684	0.372922	0.389927	0.664917	0.275619	0.490832								0.201984	0.316032	0.337871	0.608493	0.93852	0.7223
4000		0.00637	0.00637	0.006035	0.379713	0.505922	0.367991	0.004038	0.002985	0.012466	0.435798	0.631719	0.581911		0.371403	0.476891	0.358535	0.448004	0.47599	0.420342	0.302004	0.131219	0.243941					0.505107	0.544933	0.442376	0.764404	0.799357	0.433643								0.294241	0.330224	0.411829	0.906246	0.328996	0.763483
2000		0.19563	0.236198	0.062528	0.628765	0.564682	0.665369	0.076905	0.040823	0.007199	0.762587	0.573666	0.658838		0.344351	0.658931	0.523359	0.520788	0.467465	0.698625	0.221863	0.22098	0.142037					0.665781	0.519439	0.617927	0.849192	0.529327	0.73455								0.451457	0.667056	0.408883	0.804948	0.645624	0.68956
750		0.056661	0.069569	0.057667	0.812256	0.684668	0.719804	0.162063	0.086035	0.010096	0.761667	0.95968	0.694099		0.462622	0.799108	0.519831	0.542897	0.563929	0.604938	0.162932	0.178244	0.38019					0.778189	0.972415	0.788953	0.578733	0.595822	0.597796								0.484758	1.06961	0.645291	0.661479	0.690181	1.37462
250		0.469043	0.521848	0.852257	1.18213	0.907331	0.839436	0.206134	0.188224	0.103418	0.976476	1.20122	0.911118		0.838447	0.412482	0.844596	0.300133	0.337763	0.590214	0.396969	0.390598	0.359753					0.776379	0.86646	0.718705	0.700055	0.818894	0.69871								0.779583	0.662618	0.545699	0.579735	1.24452	0.829104
70		0.201665	0.138299	0.190098	1.05701	0.85838	0.64848	0.169261	0.036785	0.44633	1.09017	0.804096	1.15112		0.596806	0.252346	0.968389	0.567244	0.427812	0.188902	0.333938	0.383281	0.55711					0.851397	0.995908	0.8601	0.761641	0.697219	0.801204								1.22649	0.547697	1.00265	0.984814	1.48647	1.8674
20		0.86131	1.02543	0.722005	0.62534	1.04954	0.593908	0.899947	0.386369	0.968161	0.968946	0.969603	1.02466		1.15397	1.01517	1.15213	0.831685	0.677571	0.423958	0.57925	0.703168	0.554902					1.29185	1.19523	1.00198	0.784729	0.617282	0.744912								0.797911	0.977211	0.698904	0.86584	1.15052	0.562412
2		1.34041	1.00413	1.39255	0.387201	0.756665	1.04648	0.529205	0.904688	0.957538	0.890356	1.14658	1.24663		1.28664	0.770642	0.80533	0.794099	1.05055	1.22878	0.538375	0.703625	0.600902					1.29672	0.980473	1.07018	0.96854	0.672847	0.610625								0.608362	0.499944	0.780515	0.809395	0.80204	1.05429
0.2		0.728878	0.877068	1.07286	0.852659	0.980777	0.716617	1.33083	1.36682	1.56128	0.863758	0.88189	1.0854		0.68869	1.35242	1.09668	1.01682	1.25554	0.826799	0.720152	0.964424	0.649883					0.947093	0.959711	0.776659	0.877501	0.702579	1.01479								0.802241	0.780239	1.10237	0.607999	0.704737	1.28861
0		1.16171	0.72234	1.11595	1.12996	0.671862	1.19818	1.15489	0.620596	1.22451	1.1318	0.9545	0.913701		0.965864	0.817086	1.21705	0.74351	1.00216	1.25433	1.05592	0.945106	0.998975					0.994025	0.902895	1.10308	0.979941	0.712143	1.30792								1.16126	1.08712	0.75162	1.23538	1.00814	0.75648
Stats
[WT-Griffithsin], nM		Avg	SD												Avg	SD												Avg	SD												Avg	SD
8000		0.220718	0.209995												0.0962634	0.0683039												0.429817	0.122227												0.520867	0.25814
4000		0.24511	0.24875												0.358703	0.10944												0.581637	0.146802												0.505837	0.238897
2000		0.372766	0.279848												0.422044	0.188453												0.652703	0.11523												0.611255	0.138102
750		0.422855	0.356956												0.468299	0.191673												0.718651	0.142685												0.820989	0.304081
250		0.696553	0.369341												0.496773	0.199309												0.7632	0.0633301												0.773543	0.233352
70		0.565974	0.399577												0.475092	0.219971												0.827912	0.0930914												1.18592	0.415883
20		0.841268	0.20261												0.787979	0.251633												0.939331	0.244642												0.842133	0.189131
2		0.966869	0.29163												0.864327	0.250446												0.933231	0.233178												0.759091	0.174094
0.2		1.02657	0.256041												0.952378	0.237531												0.879722	0.108925												0.881033	0.237032
0		1	0.209317												1	0.15576												1	0.181736												1	0.18711
	WT-Grft
[Griffithsin], nM																									Avg	SD
0											77.2092	105.818	116.973	93.2653	93.7919	112.943		109.574	129.905	60.5208	116.524	96.6899	86.786		100	18.4751
0.2																		75.3986	122.438	144.25	129.269	99.6896	130.073		116.853	22.8172
2								57.2922	64.1932	65.7715	115.404	116.541	83.0544	130.052	95.2207	126.034		67.1531	115.268	56.1952	144.5	176.984	59.6984		98.2242	35.9575
20	84.4752	80.642	60.318					87.3478	90.2771	73.0294	121.291	116.779	75.8458	95.5759	78.3492	121.715		51.7233	155.934	44.4212	61.8781	115.27	166.567		93.4133	32.775
70											111.834	94.2383	80.8341	103.413	104.418	89.6539		73.2051	77.0071	105.343	126.555	61.693	48.4878		89.7235	21.4336
250	55.4635	76.7803	63.827					63.9253	88.324	80.923	117.297	73.0001	82.8271	77.3535	82.4181	95.9173		42.9589	78.394	104.131	50.3977	52.4028	64.4705		75.0451	18.7244
750								50.0643	48.2363	50.2242	112.909	63.7074	93.5604	59.8422	74.1209	63.2425		21.3497	47.6147	86.6773	68.1571	76.4642	69.3096		65.6987	21.2574
2000	39.0855	38.8272	42.1626					55.9242	47.7392	36.0779	72.044	68.5908	40.3659	49.3305	45.1719	48.2702		59.0059	64.7171	62.5532	65.2782	50.3571	68.8052		53.017	11.4726
4000	27.8089	31.6189	31.5522					46.8458	54.5816	44.4667	38.3382	41.5064	95.1082	45.7412	47.041	43.1409		34.2982	42.1711	54.4168	52.2599	7.047	6.3963		41.3522	18.6809
8000								29.7081	22.7282	20.0426	45.7254	52.3397	55.6298	47.5257	39.0026	30.2228		27.048	34.5058	30.8878	2.2062	24.3735	30.5582		32.8336	13.3102
	Q-Grft
[Griffithsin], nM																																Avg	SD
0	107.738	66.3928	122.796	103.798	77.1703	93.6428	128.461				108.719	79.4758	111.805		77.2092	105.818	116.973	93.2653	93.7919	112.943	70.1274	133.169	96.7031		83.6885	129.021	87.2908	51.5303	94.9526	153.517		100	23.0968
0.2																									129.913	128.862	50.9087	101.762	75.4127	51.6827		89.7568	32.7883
2											91.1547	88.4204	133.553		108.337	89.4706	72.2819	116.527	110.642	75.7586					88.7019	154.878	96.3304	82.8642	77.4271	110.351		99.7799	22.0954
20	96.5186	97.599	84.3658	77.6411	66.2132	88.3447	120.667				133.426	101.318	107.378		103.045	91.2154	72.0513	96.8236	102.384	97.4309					104.885	101.71	188.002	198.327	88.5559	107.006		105.678	31.2179
70															108.501	115.011	79.0221	102.514	123.671	114.298					47.2137	62.5155	55.2364	79.62	52.2821	89.8897		85.8145	25.9548
250	58.1696	57.7867	71.9663					81.457	95.0287	83.7505	139.715	94.8596	106.832		70.1241	73.2086	60.9518	52.3658	108.423	152.863					62.6297	56.9025	56.457	124.464	106.994	27.6029		82.9787	30.7251
750											42.3343	55.1149	76.5009		80.9137	94.8877	28.2373	72.929	80.1309	119.945					105.516	78.9617	74.5031	73.6009	114.408	44.2953		76.1519	25.2422
2000	50.9662	54.7389	57.4856								44.5837	59.5662	76.224		81.3595	44.954	40.7995	80.5719	57.0219	96.4708					86.1347	28.2153	33.9226	35.9465	42.8854	28.9921		55.6022	20.1223
4000	50.827	41.5905	40.9526								47.5434	54.3599	47.978		69.0055	70.9429	78.8378	37.8405	44.7861	56.2466					65.9554	6.9362	28.5117	44.8773	23.7126	29.0389		46.6635	17.5673
8000											46.5954	30.0084	23.6017		57.9534	37.2732	61.5293	50.3951	48.4596	52.3993	32.1989	33.7895	27.4696		14.5681	58.9033	29.4094	7.3268	47.4131	43.7843		39.0599	14.9675
												GLG3A
											[Griffithsin], nM																Avg	SD
											0	81.5718	106.016	112.413		126.944	108.061	64.9946		45.9173	121.796	132.287	124.388	104.379	71.2333		100	26.5049
											0.2									329.163	156.349	122.26	61.3624	77.993	59.022		134.358	93.7724
											2	85.6255	85.9381	87.6749		121.423	74.3909	116.623		150.534	245.258	96.9505	203.047	103.993	176.369		128.986	51.636
											20	80.0017	98.3666	62.8409		134.448	116.427	107.69		62.8868	124.391	191.221	96.796	87.371	108.371		105.901	33.4347
											70	75.332	67.8835	92.656		78.539	34.3605	129.579		50.4442	133.899	36.5392	61.8828	122.441	102.113		82.1391	33.0442
											250	113.17	122.428	99.3601		75.2387	134.002	96.0637		121.866	163.585	62.0184	59.614	33.5172	47.2677		94.011	37.4463
											750	60.5831	74.393	126.49		76.119	63.7594	89.0918		166.131	43.8311	75.2945	47.6477	66.9711	81.6798		80.9993	32.7712
											2000	78.7767	52.5359	80.2981		99.8867	72.8291	62.1738		92.5534	128.259	36.6141	72.5302	69.909	100.645		78.9176	23.2006
											4000	77.7439	65.2563	43.9364		35.0197	85.3862	65.3658		176.363	27.8299	76.687	50.6929	16.7214	42.2427		63.6037	39.6553
											8000	48.2287	48.1847	39.2378		3.5453	0.5211	1.8944		17.8429	33.869	27.6502	24.3346	1.7677	50.5663		24.8036	18.716

[truncated: 1 more sheets: Spike & Capture ELISA]
